# Supplementary material for: Contributions of Basal and Postprandial Hyperglycemia Over a Wide Range of A1C Levels Before and After Treatment Intensification in Type 2 Diabetes
Source: PubMed Central journal article supplement — Diabetes Care. 2011 Nov 14;34(12):2508–14. doi: 10.2337/dc11-0632 (PMC3220846; doi:10.2337/dc11-0632), 2011-11-14

SUPPLEMENTARY DATA

**Supplementary Table 1.** Studies of patients with type 2 diabetes used in pooled analysis to obtain a population with 7-point glucose profiles before and after introduction of treatment with basal insulin (insulin glargine or comparator)

| Study (No.)                         | Pre-study treatment regimen                                                                                        | Treatment comparator                                  | n/N (%)*         | Treatment duration |
|-------------------------------------|--------------------------------------------------------------------------------------------------------------------|-------------------------------------------------------|------------------|--------------------|
| Gerstein et al 2006 (11) (3502)     | 0-2 OADs (no TZD) with $\geq 1$ taken at or below $\frac{1}{2}$ maximal dose                                       | Insulin glargine                                      | 133/273 (48.7)   | 24 weeks           |
|                                     |                                                                                                                    | OAD intensification                                   | 140/273 (51.3)   |                    |
| Riddle et al 2003 (12) (4002)       | Stable doses of 1 or 2 OADs (SU, MET, rosiglitazone, pioglitazone)                                                 | Insulin glargine                                      | 185/384 (48.2)   | 24 weeks           |
|                                     |                                                                                                                    | NPH insulin                                           | 199/384 (51.8)   |                    |
| Standl et al 2006 (13) (4009)       | Uncontrolled on $\geq 1$ OAD. During screening, previous OAD regimens were replaced with glimepiride 2, 3, or 4 mg | Insulin glargine (morning)/insulin glargine (bedtime) | 378/378 (100)    | 24 weeks           |
| Janka et al 2005 (14) (4027)        | Stable doses of MET and SU. During screening, the SU was changed to glimepiride 3 or 4 mg                          | Insulin glargine                                      | 136/275 (49.5)   | 24 weeks           |
|                                     |                                                                                                                    | NPH 70/30 insulin                                     | 139/275 (50.5)   |                    |
| Bretzel et al 2008 (15) (4040)      | Stable doses of $\geq 1$ OAD (no alpha-glucosidase inhibitor) for $\geq 3$ months                                  | Insulin glargine                                      | 155/314 (49.4)   | 44 weeks           |
|                                     |                                                                                                                    | Insulin lispro                                        | 159/314 (50.6)   |                    |
| Yki-Järvinen et al 2006 (16) (6001) | Stable doses of MET and SU or MET alone for $\geq 3$ months. SU was discontinued at randomization                  | Insulin glargine                                      | 39/75 (52)       | 36 weeks           |
|                                     |                                                                                                                    | NPH insulin                                           | 36/75 (48)       |                    |
| Overall                             |                                                                                                                    | Insulin glargine                                      | 1026/1699 (60.4) | $\geq 24$ weeks    |
|                                     |                                                                                                                    | Comparator                                            | 673/1699 (39.6)  |                    |

\*Number of patients out of the subset of patients with complete 7-point glucose profile data at baseline and week 24. MET, metformin; OAD, oral antidiabetic drug; SU, sulfonylurea; TZD, thiazolidinedione.

SUPPLEMENTARY DATA

**Supplementary Table 2.** Incidence of hypoglycemia

|                     | Symptomatic hypoglycemia | Glucose-confirmed symptomatic hypoglycemia* | Severe symptomatic hypoglycemia* |
|---------------------|--------------------------|---------------------------------------------|----------------------------------|
| Basal insulin       | 750/1261 (59.5%)         | 374/1186 (31.5%)                            | 14/1186 (1.2%)                   |
| Others              | 285/438 (65.1%)          | 185/438 (42.2%)                             | 11/438 (2.5%)                    |
| Odds ratio (95% CI) | 0.788 (0.628, 0.988)     | 0.630 (0.503, 0.789)                        | 0.464 (0.209, 1.029)             |
| <i>P</i>            | 0.0390                   | <0.0001                                     | 0.0589                           |

\*One of the studies (16) did not collect severity of glucose level for hypoglycemia events and thus were not included in the glucose-confirmed or severe hypoglycemia assessments.

**Supplementary Figure 1.** Depiction of the normal glycemic exposure ( $AUC_N$ ), basal hyperglycemia ( $AUC_B$ ), and postprandial hyperglycemia ( $AUC_P$ ). The total area under the glucose curve is the sum of the above 3 measures [ $AUC_N + AUC_B + AUC_P$ ].

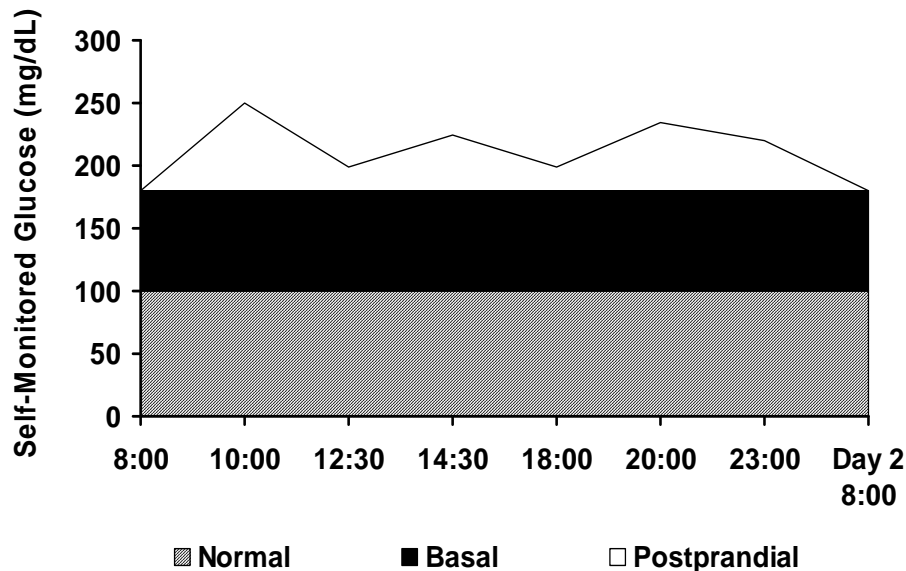

Supplement: supp_dc11-0632v110632_DC110632SupplementaryData.pdf [file supp_dc11-0632v110632_DC110632SupplementaryData.pdf]
